# Supplementary material for: Phytochrome Interacting Factors (PIFs) in Solanum lycopersicum: Diversity, Evolutionary History and Expression Profiling during Different Developmental Processes
Source: PLoS One. 2016 Nov 1;11(11):e0165929. doi: 10.1371/journal.pone.0165929 (PMC5089782; doi:10.1371/journal.pone.0165929)
Supplement: S4 Table — (XLSX) [file pone.0165929.s013.xlsx]

## Sheet: Plan1
S4 Table. Primers used por qPCR analysis.
Gene	Locus	Sequence
Actin	Solyc01g104770	F	TCCGGGCATCTGAACCTCT
		R	TTGACATTTTCTTGATTGCCC
CAC	Solyc08g006960	F	CCTCCGTTGTGATGTAACTGG
		R	ATTGGTGGAAAGTAACATCATCG
Expressed	Solyc07g025390	F	GCTAAGAACGCTGGACCTAATG
		R	TGGGTGTGCCTTTCTGAATG
GAGA	Solyc04g008380	F	GTAGTTTATTGATGGATGACGACG
		R	GGTGCTTCTGGGATGATAG
SlGLK1	Solyc07g053630	F	GCTGTAGAGCAACTAGGTGTAGATAAGG
		R	CAACTCGCTGCCTCCACTTC
SlORE1S02	Solyc02g088180	F	ACAACAGCGAGAAGTAGTGG
		R	GCATCAATCCAGAATCTCCATAC
SlORE1S03	Solyc03g115850	F	ACATTTCAGGGCTTGTGAGA
		R	AGGTGAATTGTTGAAGGAATTGAT
SlORE1S06	Solyc06g069710	F	GATTCTGCTACTGCTACTGCTT
		R	GGATCTTGAACCCCAAATGAAG
SlPIF1a	Solyc09g063010	F	AACTTCTTGCTTTGCTCTCTG
		R	GCTCCGCCCATAAATCA
SlPIF1b	Solyc06g008030	F	TAGTATGGCAAAATGGTGGAG
		R	CGGCGTCACAACTCGGTG
SlPIF3	Solyc01g102300	F	AAGGCTTCCCAATAATGC
		R	CCATCAGACCAAACTTCCC
SlPIF4	Solyc07g043580	F	GGCTTAGGTTCACATACAG
		R	TGATGGTGTCGTTGTCTC
SlPIF7a	Solyc03g115540	F	CCTCACCTACATAACCAGCA
		R	ATACAGCACCCCAGTTTTCA
SlPIF7b	Solyc06g069600	F	GTACTCCACCACAACCTATT
		R	TTGACATTTTCTTGATTGCCC
SlSAG12	Solyc02g076910	F	ATGTCCTCCTCAAAGCCAAA
		R	TTTCAGTTGGTGTAGCCCTT
TIP41	Solyc10g049850	F	ATGGAGTTTTTGAGTCTTCTGC
		R	GCTGCGTTTCTGGCTTAGG
